# Supplementary material for: Structural Features, Physicochemical Properties, and In Vitro Digestibility of the Starch-Lipid Complexes Formed between High Amylose Starch and Stearic Acid or Potassium Stearate
Source: MDPI journal article supplement (doi:10.3390/foods13060859), 2024-03-12

## Supplementary material

Figure S1. X-ray diffraction patterns of stearic acid (SA) and potassium stearate (PS).

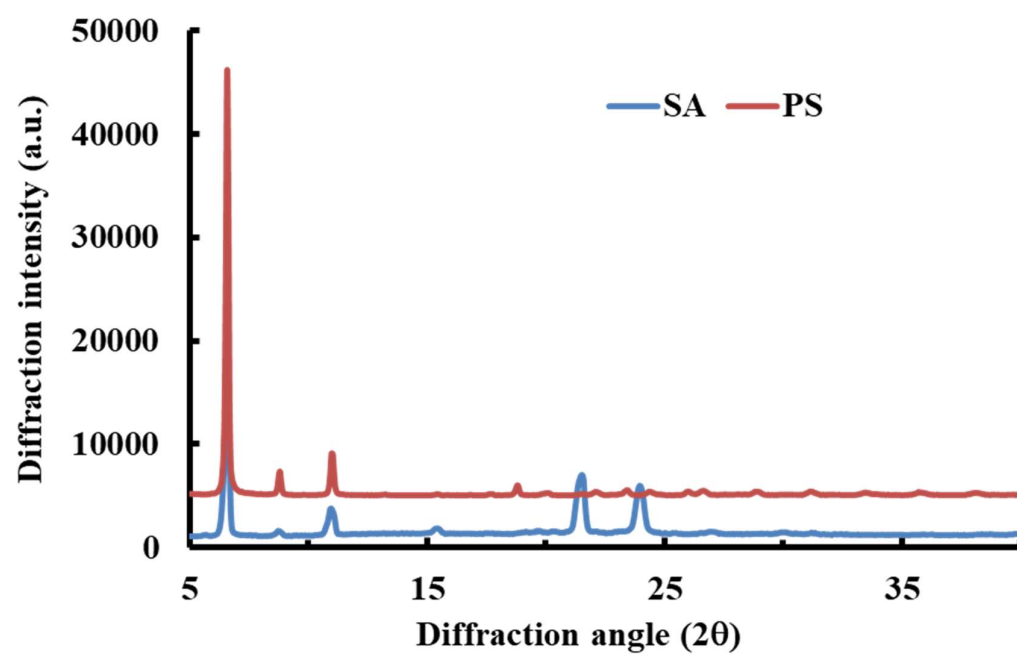

**Figure S2.** Enlarged FTIR spectra of HAS (control) and HAS-SAs (a), and HAS-PSs (b) at the range of 1200~800  $\text{cm}^{-1}$ . The HAS-SAs/PSs were prepared from the dispersions containing 2.0 % (w/v) high amylose starch (HAS) with stearic acid (SA) or potassium stearate (PS) at molar concentrations of 0.5~2.0 mM.

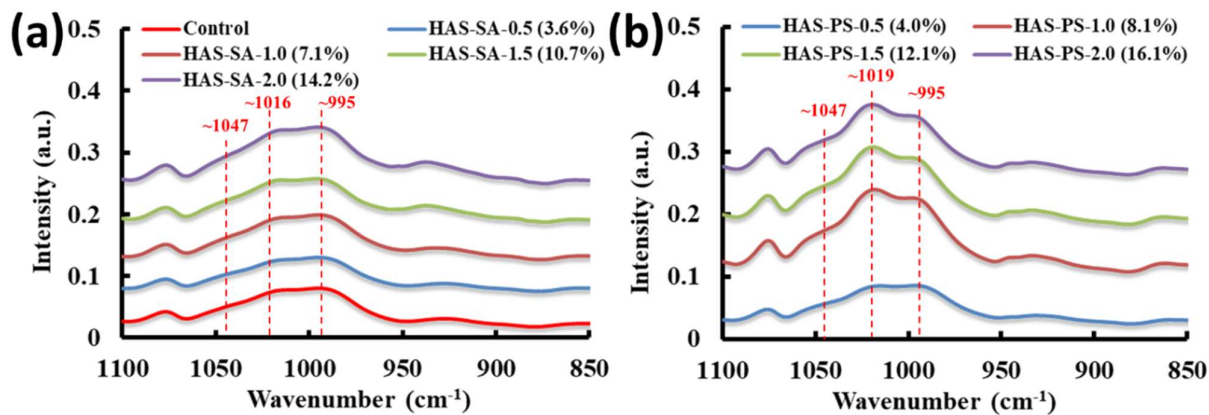

Supplement: s1 [file s1]
